# Supplementary material
Source: PubMed Central journal article supplement (PMC3398562)
Supplement: supp_tpc.111.092304_tpc092304SD.pdf [file supp_tpc.111.092304_tpc092304SD.pdf]

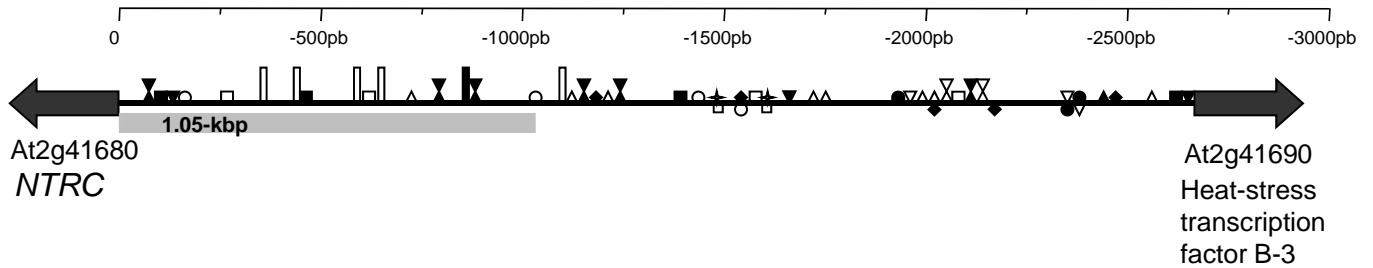

| Symbol | Cis-element | Function                      |
|--------|-------------|-------------------------------|
| █      | Athb1       | Leaf development              |
| ▽      | Sorlip 1    | Light response                |
| ○      | Tbox        | Light response                |
| □      | LTRE        | Stress response               |
| ▲      | Ibox        | Light response                |
| ●      | BoxII       | Interaction with TATA complex |
| ⌵      | GATA box    | Light response                |
| ■      | Bellringer  | Floral development            |
| ◆      | W-box       | Plant defense response        |
| ●      | CArG        | Floral development            |
| ▼      | ARF1        | Auxin response elements       |
| ⊗      | LFY         | Flower development            |
| ✦      | DRE         | Environmental stress          |
| △      | Rav         | Floral development            |
| ▭      | MYB         | Environmental stress          |
| ◻      | DPBF1       | ABA-responsiveness            |

**Suppl. Fig. 1.** Scheme showing the position of the *NTRC* gene (Atg41680) and the flanking At2g41690 gene in Arabidopsis and distribution of possible *cis*-acting elements. The 1.05-kbp fragment containing the putative *NTRC* gene promoter transcriptionally fused to the GUS reporter gene is indicated. The 3-kbp of 5' regulatory region of *NTRC* was analyzed for the presence of putative *cis*-acting regulatory elements using Arabidopsis Gene Regulatory Information Server (AGRIS) database (<http://arabidopsis.med.ohio-state.edu/AtcisDB>) (Davuluri et al., 2003). Based on the AtcisDB Genomic View (<http://arabidopsis.med.ohio-state.edu/cgi-bin/gb2/gbrowse/atcisdb/?q=Chr2:17385620..17388800>) all the motifs listed in the AGRIS database were mapped.

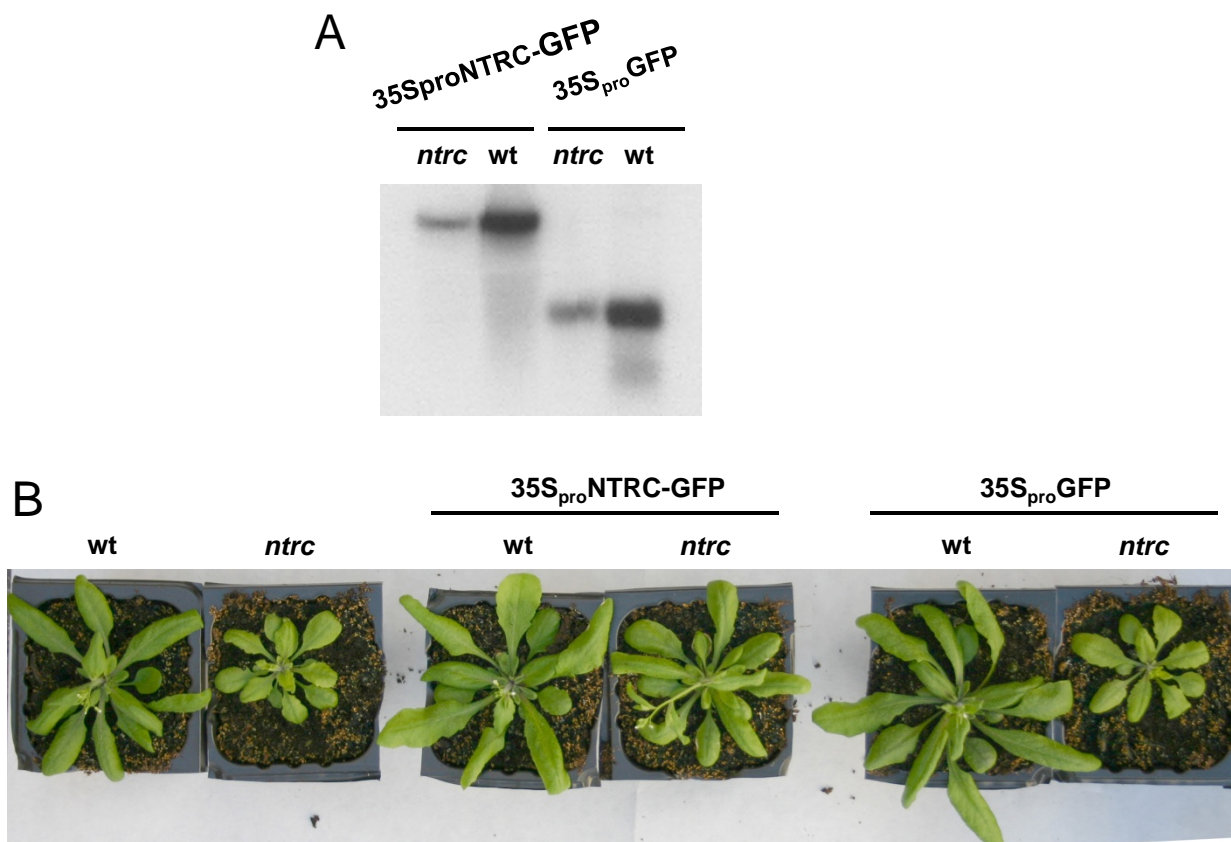

**Suppl. Fig. 2.** Characterization of transgenic plants expressing the NTRC-GFP fusion protein or GFP under the control of the CaMV 35S promoter in wild type and *ntrc* mutant backgrounds.

(A) Total RNA isolated from leaves of Arabidopsis wild type, *ntrc* mutant and transgenic lines, were analysed by RNA gel blot probed with <sup>32</sup>P-labelled GFP cDNA, which shows expression of the transgenes in both wild type and *ntrc* backgrounds. (B) Complementation of the *ntrc* phenotype by the expression of the NTRC-GFP fusion protein. Plants were grown in standard long-day conditions (16/8) for 28 days.

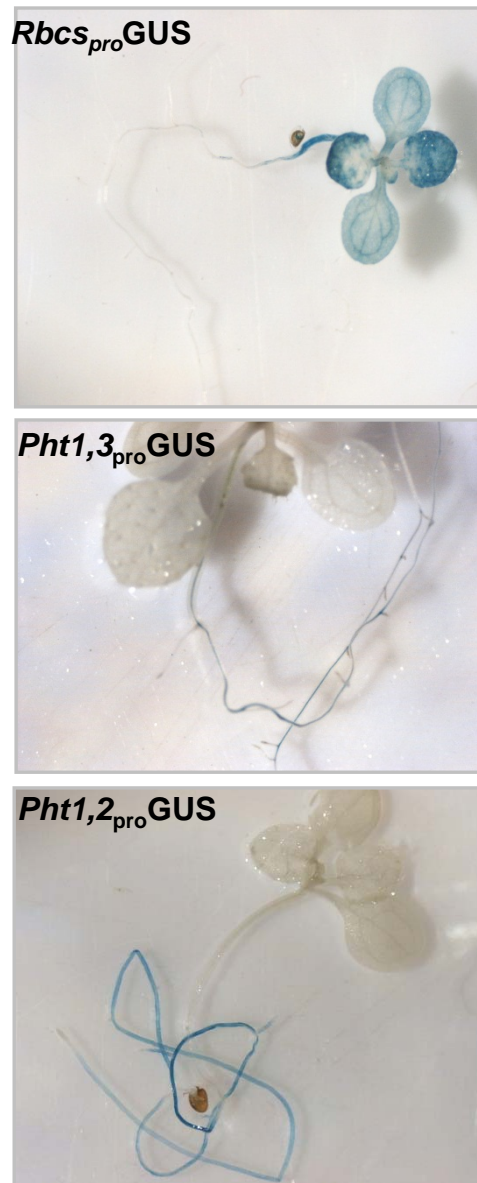

**Suppl. Fig. 3.** Histochemical localization of GUS expression under the control of organ-specific promoters. GUS staining of Arabidopsis seedlings expressing the GUS reported gene under the control of leaf-specific (*Rbcs*) or root-specific (*Pht1,2* and *Pht1,3*) promoters.

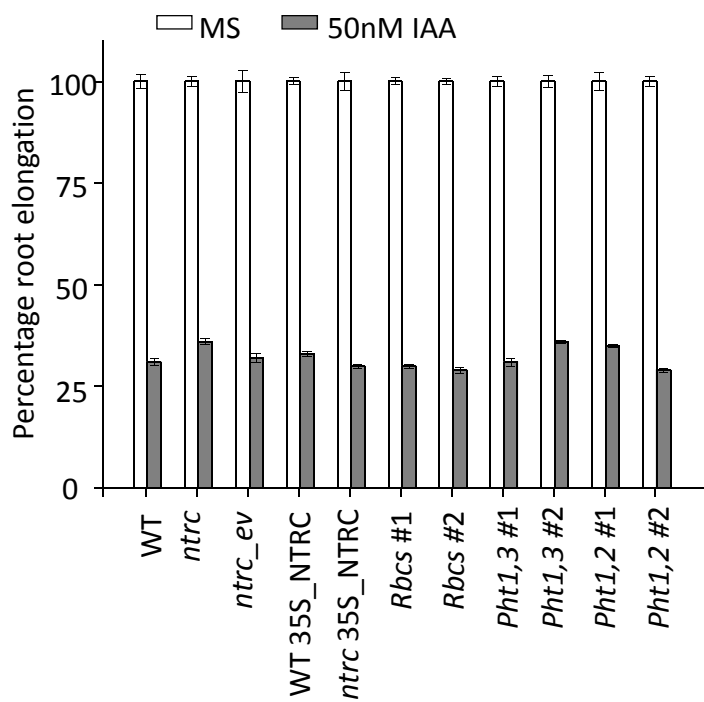

**Suppl. Fig. 4.** Effect of IAA treatment on root growth inhibition. Seedlings of the different *Arabidopsis* lines under analysis, as indicated, were grown for 5 days on MS medium under long day conditions. Then seedlings were transferred to media containing 50 nM IAA for an additional period of 3 days. Root length was expressed as a percentage of root elongation of seedling not treated with IAA. Mean values  $\pm$  standard errors are indicated.

**Suppl. Table 1.** Expression of genes encoding NTRC, 2-Cys PRX A and 2-Cys PRX B in different Arabidopsis organs based on data obtained from Genevestigator.

| Gene                       | Leaves              | Roots               | Stems                | Flowers             |
|----------------------------|---------------------|---------------------|----------------------|---------------------|
| NTRC<br>(At2g41680)        | High<br>9396 ± 122  | Low<br>1362 ± 30    | High<br>6024 ± 396   | High<br>3235 ± 125  |
| 2-Cys PRX A<br>(At3g11630) | High<br>57385 ± 627 | High<br>12252 ± 258 | High<br>51023 ± 1859 | High<br>25984 ± 934 |
| 2-Cys PRX B<br>(At5g06290) | High<br>21025 ± 227 | Medium<br>2266 ± 78 | High<br>15077 ± 566  | High<br>7950 ± 403  |

**Suppl. Table 2.** Expression of genes encoding the alternative pathway for redox regulation in root amyloplasts based on data obtained from Genevestigator.

| Gene                        | Leaves                | Roots                |
|-----------------------------|-----------------------|----------------------|
| <i>FNR1</i><br>(At5g66190)  | High<br>46488 ± 513   | Low<br>1446 ± 169    |
| <i>FNR2</i><br>(At1g20020)  | High<br>43957 ± 530   | Low<br>548 ± 76      |
| <i>RFNR1</i><br>(At4g05390) | Medium<br>3099 ± 78   | High<br>7029 ± 186   |
| <i>RFNR2</i><br>(At1g30510) | Medium<br>1979 ± 36   | High<br>23583 ± 569  |
| <i>Fd1</i><br>(At1g10960)   | High<br>46436 ± 622   | Medium<br>7383 ± 346 |
| <i>Fd2</i><br>(At1g60950)   | High<br>108053 ± 1097 | High<br>8433 ± 339   |
| <i>FTRA</i><br>(At5g23440)  | High<br>5418 ± 55     | Low<br>1054 ± 15     |
| <i>FTRB</i><br>(At2g04700)  | High<br>25140 ± 225   | Medium<br>3590 ± 56  |
| <i>Trxf1</i><br>(At3g02730) | High<br>31856 ± 395   | Low<br>1081 ± 82     |
| <i>Trxf2</i><br>(At5g16400) | High<br>9637 ± 136    | Low<br>580 ± 36      |

**Suppl. Table 3.** Gene-specific oligonucleotides used for qPCR analysis.

| <b>Gene</b>                    | <b>Primers</b>                                                     |
|--------------------------------|--------------------------------------------------------------------|
| <i>NTRC</i> (At2g41680)        | 5'-TCACCAACATGTGGCCC-3'<br>5'-TTCTTCATCTTCACACCCGA-3'              |
| <i>2-Cys PRX A</i> (At3g11630) | 5'-ACTTCATCTCTTCTCCC-3'<br>5'-AGGAGAAGAAAGGGTTCGAA-3'              |
| <i>2-Cys PRX B</i> (At5g06290) | 5'-CACCACCCTACTCTCTT-3'<br>5'-GGAAGAGGGTATGATTCTGG-3'              |
| <i>Fd1</i> (At1g10960)         | 5'-CATCACACCTGAGGGAGAACAAGA -3'<br>5'- GAAGTCGGATAAGCCACACAG-3'    |
| <i>Fd2</i> (At1g60950)         | 5'-CGTGGTGGACGTGTACACAG-3'<br>5'-CAACAGATCCAGACACAACCTTACC-3'      |
| <i>FNRI</i> (At5g66190)        | 5'-CTACCGAGGCACCACCAG-3'<br>5'-CGATTGTCCTTCTCTGTACGG-3'            |
| <i>FNR2</i> (At1g20020)        | 5'-GAACAGATACTCCTACTCCTGCAAAG-3'<br>5'-CGATTGTCCTTCTCTGTACGG-3'    |
| <i>RFNR1</i> (At4g05390)       | 5'-GGACAATGGAGCTCATATTTACTTC-3'<br>5'-CTTCTTGGTTGAGTTACACTGTG-3'   |
| <i>RFNR2</i> (At1g30510)       | 5'-GGACAATGGAGCTCATATTTACTTC-3'<br>5'-CAAACCAACAAATTCAGATATTATC-3' |
| <i>FTRA</i> (At5g23440)        | 5'-GCCACTACTGCTACCGCCAC-3'<br>5'-CGCTTCCGCTTCGATTTCTTC-3'          |
| <i>FTRB</i> (At2g04700)        | 5'-CTCGATGAATCTTCAAGCTGTTTC-3'<br>5'-CAAAGCGGTGCACCATATGAATC-3'    |
| <i>Trxf1</i> (At3g02730)       | 5'-GGTGTGGTCCATGTAAAGTGATTGC-3'<br>5'-GACTGGTTCATCCGGAAGCAG-3'     |
| <i>Trxf2</i> (At5g16400)       | 5'-GGTGATAAGATTGTTGTCCTCGAC-3'<br>5'-CTTCAATGGCTGCAAGTAAGTCTTC-3'  |

**Suppl. Table 4.** Oligonucleotides used for constructs to generate transgenic lines.

| <b>Transgenic line</b> | <b>Oligonucleotides</b>                               |
|------------------------|-------------------------------------------------------|
| <i>NTRCpro:GUS</i>     | F-NOster-NotI (5'-AATTGCTACCGCGGCCGCGAATTT-3')        |
|                        | R-NOster-SacI (5'-CAGTGAGCTCCCGATCTAGTAACATAGAT-3')   |
|                        | FpNtrc-HindIII (5'-GTAAGCTTCACGCGTCTGTAAAT-3')        |
|                        | RpNtrc-XbaI (5'-GGTCTAGAATTTTTTTTGGATTGCCTTACC-3')    |
|                        | F-GUS-XbaI (5'-AACACGGGGGACTCTAGAGGATCC-3')           |
|                        | R-GUS-NotI (5'-ACGCGGCCGCGAGTTGTTGATTCATTGTTT-3')     |
| NTRC-GFP               | Ntrc-F-KpnI (5'-CAGGTACCATGGCTGCGTCTCC-3')            |
|                        | Ntrc-R-SmaI (5'-GACCCGGGgTCATTTATTGGCCTCAATG-3')      |
| <i>Pht1,2pro:NTRC</i>  | <i>Pht1,2</i> -Fw (5'-TAGGATCCGATCACTATACTACTCTGC-3') |
|                        | <i>Pht1,2</i> -Rev (5'-GAGGTACCTCTCTTGTCTTTCC-3')     |
| <i>Pht1,3pro:NTRC</i>  | <i>Pht1,3</i> -Fw (5'-TAGGATCCTAATGAGTATAAGAG-3')     |
|                        | <i>Pht1,3</i> -Rev (5'-CTGGTACCTCTCCTATTTTGCAC-3')    |
| <i>Rbcs1Apro:NTRC</i>  | <i>Rbcs</i> -Fw (5'-TGGGATCCTGAGTCTCAAAGTGGC-3')      |
|                        | <i>Rbcs</i> -Rev (5'-TGGTACCTCTTCTTTACTCTTTG-3')      |
| GATEWAY tails          | AttB1 tail (5'-GGGGACAAGTTTGTACAAAAAAGCAGGCT-3')      |
|                        | AttB2 tail (5'-GGGGACCACTTTGTACAAGAAAGCTGGGT-3')      |
| NTRC cDNA              | (5'-CAGGTACCATGGCTGCGTCTC-3')                         |
|                        | (5'-GAGAGCTCTCATTATTGGCCTCA-3')                       |
